# Supplementary material for: Nucleosome-CHD4 chromatin remodeler structure maps human disease mutations
Source: eLife. 2020 Jun 16;9:e56178. doi: 10.7554/eLife.56178 (PMC7338049; doi:10.7554/eLife.56178)
Supplement: Figure 2—source data 1. — Average and standard deviation data for Figure 2. [file elife-56178-fig2-data1.xlsx]

## Sheet: Sheet1
	Average							STDEV
Wavelength	No Chd No ATP	No Chd AMPPNP	Chd1 AMPPNP	CHD4 AMPPNP	No Chd ADPBeF3	Chd1 ADPBeF3	CHD4 ADPBeF3	No Chd No ATP	No Chd AMPPNP	Chd1 AMPPNP	CHD4 AMPPNP	No Chd ADPBeF3	Chd1 ADPBeF3	CHD4 ADPBeF3
520	0.00022291	0.000227972	0.000221546	0.000193819	0.000219975	0.000241604	0.000236866	5.17726e-05	2.29282e-05	7.77704e-07	5.91586e-06	3.12885e-05	2.05116e-05	2.14103e-05
521	0.000145783	0.000161045	0.00017484	0.000156497	0.000167395	0.000183162	0.00018469	9.25292e-06	1.34791e-05	5.03076e-06	7.48158e-06	1.27183e-05	1.78704e-05	1.3383e-05
522	0.00011655	0.000113537	0.000126153	0.000117483	0.000121522	0.000139562	0.000128466	4.86585e-06	4.99936e-06	2.28435e-06	8.89238e-06	6.60367e-06	8.53038e-06	1.48385e-06
523	0.000109709	0.00010105	0.000114395	0.000102672	0.000110804	0.000121429	0.000116961	1.84129e-06	3.83589e-06	2.36611e-06	4.73623e-06	4.57443e-06	3.0599e-06	1.91857e-06
524	0.000105553	0.00010664	0.000119645	0.000106981	0.00011389	0.000128185	0.000121585	1.63896e-06	5.62149e-06	4.99266e-06	4.32998e-06	4.295e-06	4.11671e-06	4.56107e-06
525	0.000117843	0.000109748	0.000123428	0.000114658	0.000118449	0.000134882	0.00012357	2.73522e-06	4.02169e-06	6.57305e-06	5.10816e-06	5.41915e-06	5.53854e-06	7.8423e-06
526	0.000129486	0.000123323	0.000138597	0.000125862	0.000133462	0.000150897	0.00013965	1.84806e-06	4.32227e-06	6.9068e-06	4.3299e-06	3.89971e-06	4.05209e-06	3.24641e-06
527	0.000149983	0.000140175	0.000160667	0.000141135	0.000147265	0.000165916	0.0001559	9.07045e-06	2.92019e-06	5.00799e-06	2.33137e-06	4.59915e-06	4.42237e-06	4.21798e-06
528	0.000170084	0.000161405	0.000188393	0.000157822	0.000169444	0.000190994	0.000174837	7.72995e-06	4.52653e-06	1.03591e-05	2.14477e-06	2.25513e-06	8.45045e-06	3.48115e-06
529	0.000202648	0.000190486	0.000222097	0.000183828	0.000207121	0.000229945	0.00020122	6.0045e-06	2.5881e-06	9.02908e-06	1.14379e-06	3.06786e-06	1.82799e-06	3.33441e-06
530	0.000232485	0.000219974	0.00025519	0.000209142	0.000225389	0.000264137	0.000233669	7.56131e-06	6.0551e-06	1.28667e-05	6.4632e-06	4.90908e-06	3.33128e-06	4.49929e-06
531	0.000275182	0.000269599	0.000303868	0.000249689	0.000282138	0.00031169	0.000271905	9.28422e-06	8.57837e-06	1.78274e-05	1.05632e-05	8.18043e-06	1.30192e-06	5.59259e-06
532	0.000331607	0.000316023	0.000365469	0.000290728	0.000325401	0.000371281	0.000320391	6.65797e-06	4.57213e-06	2.14655e-05	1.41394e-05	1.04532e-05	1.66598e-05	1.85535e-05
533	0.000401746	0.000370286	0.000424713	0.000334413	0.000388133	0.00043977	0.000370492	1.81869e-05	3.95515e-06	2.7389e-05	9.37936e-06	4.08604e-06	6.2512e-06	9.03543e-06
534	0.000463574	0.000448908	0.00051986	0.000409465	0.000462882	0.000531232	0.000448975	1.75368e-05	1.86608e-06	2.11573e-05	1.21792e-05	9.74222e-06	6.10268e-06	6.8285e-06
535	0.000578186	0.000549212	0.000612235	0.000477662	0.00056116	0.000624459	0.000522938	1.83848e-05	5.65778e-06	3.31616e-05	1.2857e-05	1.12067e-05	5.37891e-06	7.97902e-06
536	0.000702769	0.00065135	0.000748182	0.000589966	0.000669426	0.00075254	0.000645269	3.50509e-05	7.0111e-06	4.40516e-05	1.33496e-05	1.38586e-05	1.49414e-05	1.76445e-05
537	0.000839689	0.000796781	0.000914222	0.000711989	0.000823048	0.000933989	0.000783293	4.36546e-05	1.49392e-05	6.05086e-05	1.71852e-05	1.29769e-05	1.3646e-05	1.06884e-05
538	0.00103419	0.000948415	0.00106443	0.000842	0.000982476	0.00110071	0.000917029	4.02667e-05	7.4503e-06	6.99281e-05	2.41541e-05	9.81692e-06	3.95933e-06	2.11666e-05
539	0.00120349	0.00115703	0.00132814	0.00102251	0.00118182	0.00133461	0.00112008	3.03138e-05	8.68852e-06	7.16676e-05	3.98552e-05	1.40829e-05	1.85744e-05	3.00437e-05
540	0.00146453	0.00140896	0.00161839	0.00126185	0.00145227	0.00162622	0.00135729	4.81129e-05	7.89997e-06	0.000105302	3.28492e-05	1.99917e-05	1.82622e-05	4.54785e-05
541	0.00175087	0.00162877	0.00185464	0.00144956	0.00166885	0.0018965	0.00156978	9.78664e-05	2.42361e-05	0.000106707	3.71761e-05	2.41407e-05	2.26729e-05	4.9121e-05
542	0.00205123	0.0019892	0.00225124	0.0017534	0.00203905	0.00232049	0.00192724	6.74847e-05	2.78352e-05	0.00012454	4.50397e-05	2.2918e-05	1.87043e-05	4.85577e-05
543	0.00248173	0.002399	0.00275813	0.0021296	0.00246655	0.00277447	0.00232029	7.06973e-05	1.22136e-05	0.000163121	4.19762e-05	3.27706e-05	3.73051e-05	6.20197e-05
544	0.00299129	0.00279063	0.0031733	0.00246693	0.00286155	0.00321462	0.00267756	8.85908e-05	2.96744e-05	0.000173835	6.19942e-05	4.93032e-05	3.37639e-05	5.61406e-05
545	0.00338425	0.00327905	0.00375318	0.0029043	0.00333655	0.00378419	0.00312919	7.84774e-05	3.41704e-05	0.000197054	6.45801e-05	5.32525e-05	5.54522e-05	8.25535e-05
546	0.00400031	0.00384843	0.00442845	0.00346948	0.0039719	0.00448202	0.00376437	0.000124085	4.76699e-05	0.000233733	8.41548e-05	5.14916e-05	5.54704e-05	6.78776e-05
547	0.00463456	0.00441083	0.00502394	0.00392024	0.00453467	0.00509347	0.0042472	0.000131195	2.17217e-05	0.00029138	7.92675e-05	5.16819e-05	7.30119e-05	8.20812e-05
548	0.00526928	0.00506253	0.00579752	0.00455991	0.00516266	0.00589049	0.00491669	0.000207729	4.54998e-05	0.000323526	8.7624e-05	9.27859e-05	3.77043e-05	8.70201e-05
549	0.0059591	0.00571531	0.00657498	0.00517965	0.00589251	0.0065892	0.00552278	0.000142856	4.52647e-05	0.000408633	0.000153263	7.67892e-05	0.000127809	0.000129814
550	0.00668749	0.00640283	0.00730033	0.00577514	0.00651336	0.00736215	0.00622326	0.000152678	4.79277e-05	0.000365042	9.26448e-05	0.000114516	9.53924e-05	0.000114313
551	0.00726836	0.00710528	0.0082422	0.00651555	0.00728561	0.00830541	0.00703386	0.000140674	7.40082e-05	0.000473826	0.000108557	9.27959e-05	8.72532e-05	0.000122393
552	0.00804202	0.00782456	0.00894715	0.00706051	0.0078921	0.00893922	0.00758379	0.00017468	6.62162e-05	0.000428836	0.00011091	0.000123984	0.000100707	8.71413e-05
553	0.00878575	0.00845378	0.0098154	0.00794791	0.00874857	0.0100002	0.0083852	0.000180377	5.40979e-05	0.000654387	0.000192827	0.000103777	0.000177923	0.000108822
554	0.0092538	0.00909681	0.0106033	0.0084703	0.00929753	0.0105971	0.0090524	0.000104362	9.01771e-05	0.000546687	0.00015757	0.000152195	9.03315e-05	7.72403e-05
555	0.00994099	0.00972842	0.0113455	0.00917857	0.00995517	0.0113704	0.00970317	0.000185796	8.59775e-05	0.000614582	0.000174288	0.000148568	0.000115065	9.59407e-05
556	0.0104927	0.0101978	0.0117761	0.00960247	0.0103947	0.0118613	0.0102018	0.000111878	6.98403e-05	0.000620926	0.000167813	8.20941e-05	5.76044e-05	9.16951e-05
557	0.0107854	0.0106715	0.0123636	0.0102061	0.0109735	0.0125031	0.0107749	0.00010001	0.000132677	0.000649807	0.000133838	0.000135401	7.33836e-05	5.25703e-05
558	0.0112218	0.0110625	0.0129237	0.0105854	0.0113036	0.0129904	0.0112111	0.000116202	0.000129367	0.000700346	0.000218672	0.000133591	3.27771e-05	5.62599e-05
559	0.011531	0.0113657	0.0132023	0.0109671	0.011625	0.0133055	0.0115439	5.77642e-05	0.000131264	0.000737557	0.000171658	0.000148929	4.72833e-05	8.96119e-05
560	0.0117058	0.011518	0.013417	0.0111866	0.0117884	0.0134987	0.0116972	6.90762e-05	0.000113533	0.00070137	0.000249131	0.000176615	9.17604e-05	0.000115381
561	0.0117822	0.0116071	0.0135819	0.0113393	0.0118729	0.0136529	0.0119107	9.2783e-05	0.00014814	0.000687218	0.000178642	0.000159861	7.59008e-05	0.000129334
562	0.0117412	0.0116626	0.0135982	0.011455	0.0118948	0.0136404	0.0119642	8.50521e-05	0.000180786	0.000740654	0.000225182	0.000187198	3.89252e-05	2.58691e-05
563	0.0117038	0.0115952	0.013499	0.0114336	0.0118438	0.0136383	0.0120174	4.44067e-05	0.000128344	0.00072816	0.000227515	0.000135722	3.33802e-05	5.91003e-05
564	0.0115608	0.0114009	0.0133335	0.011319	0.0116789	0.0133785	0.0118521	1.84821e-05	0.000177706	0.000720135	0.000225044	0.000171096	4.60891e-05	0.000101863
565	0.0114109	0.0112806	0.0132017	0.0112079	0.0115356	0.0133317	0.0117185	4.33638e-05	0.000200419	0.000652193	0.000218396	0.000146386	3.24857e-05	6.98506e-05
566	0.0111199	0.0110441	0.0129088	0.0109626	0.0112563	0.013078	0.0114688	2.21168e-05	0.000181499	0.000650056	0.000190961	0.000164759	1.62906e-05	0.000133492
567	0.0108012	0.0107369	0.0126024	0.010688	0.0109377	0.012609	0.0111945	1.06393e-05	0.000181858	0.000688725	0.000222761	0.00013475	3.69147e-05	6.14123e-05
568	0.0105108	0.0103882	0.0121845	0.0104268	0.0106665	0.0123458	0.0108612	4.09844e-05	0.000161826	0.000597103	0.000235615	0.000203424	3.99313e-05	0.000130005
569	0.01026	0.0101611	0.0119414	0.0102488	0.0103517	0.0119654	0.0105458	2.87038e-05	0.000144979	0.000653982	0.00023795	0.000149753	2.73323e-05	0.000109554
570	0.00974881	0.00972924	0.0114895	0.00984099	0.0098908	0.0115407	0.0102016	4.59873e-05	0.000157836	0.000588905	0.000191544	0.000134781	9.61246e-06	0.000150017
571	0.00948633	0.00939184	0.0111091	0.00953264	0.00963705	0.0111718	0.0099044	6.65956e-05	0.000194934	0.000621084	0.000144145	0.000186104	3.13543e-05	0.00012144
572	0.00909884	0.0090113	0.0106243	0.00917768	0.00927744	0.0107396	0.00947872	4.20256e-06	0.000238361	0.000581429	0.000160705	0.000187166	3.5542e-05	0.000103702
573	0.00878683	0.0087319	0.0102509	0.00878903	0.00892498	0.0102814	0.00910644	1.21185e-05	0.000156639	0.000510268	0.000205149	0.000128438	4.29507e-05	0.000108557
574	0.00843232	0.00841385	0.0098758	0.00855448	0.00861165	0.0100259	0.00886972	2.06938e-05	0.000177785	0.000510449	0.000157921	0.000180748	4.54255e-05	0.000101431
575	0.0080977	0.00806718	0.00949181	0.00815212	0.00823929	0.00947395	0.00849372	7.33333e-05	0.000146717	0.000457598	0.000151573	0.000122824	6.27439e-05	0.000143879
576	0.00782272	0.00772935	0.00905394	0.00786134	0.0078967	0.00913781	0.00810272	2.70994e-05	0.000139807	0.000407401	0.000125915	0.0001446	3.76011e-05	8.05999e-05
577	0.00747406	0.00740115	0.00870408	0.00748887	0.00756955	0.00875549	0.00776294	9.88826e-06	0.000131289	0.000379727	0.000152067	0.000136339	3.80733e-05	0.00012611
578	0.00717474	0.00718367	0.00840987	0.00726184	0.0072952	0.00845497	0.00748747	5.06448e-05	0.000135421	0.00047699	0.000148927	0.000110488	2.40069e-05	9.01345e-05
579	0.0069357	0.00683503	0.00800817	0.00694317	0.00702345	0.00807603	0.00719038	3.43084e-05	0.000143838	0.000381268	0.000104621	0.000144037	2.91779e-05	0.000117044
580	0.00664308	0.00656075	0.00769188	0.00665374	0.00672868	0.00772079	0.00688288	2.7409e-05	0.00014584	0.000389885	0.000121932	8.52866e-05	4.58858e-06	9.65856e-05
581	0.00637476	0.00635097	0.00748077	0.00646827	0.00651365	0.00753739	0.0066519	2.03789e-05	0.0001438	0.000342836	0.000108924	0.000143801	4.91316e-06	6.75139e-05
582	0.00618424	0.00614384	0.00719188	0.00618044	0.00626752	0.00729622	0.00641689	1.10725e-06	0.000111403	0.000341105	9.78047e-05	0.000108533	3.47173e-05	5.56687e-05
583	0.00594186	0.00589718	0.00692348	0.00593547	0.00602805	0.00697014	0.00616992	7.16774e-06	0.000106165	0.000328376	0.000126184	0.000107115	7.30357e-06	0.000102793
584	0.00576318	0.00569013	0.00669551	0.00574374	0.00582694	0.00674223	0.00594803	9.62897e-06	8.92097e-05	0.000307195	0.000110034	9.8644e-05	3.3422e-05	0.000112439
585	0.00561339	0.00556019	0.00651839	0.00556154	0.0056817	0.00655378	0.00580573	3.65659e-05	0.000135251	0.000332157	0.000103803	7.42976e-05	4.22736e-05	7.54328e-05
586	0.00546845	0.00536726	0.00630278	0.00539699	0.00552818	0.00634305	0.00562685	1.00317e-05	0.000100089	0.000320086	8.06815e-05	9.16346e-05	5.02955e-05	5.49991e-05
587	0.00533398	0.00527342	0.0061721	0.00524012	0.00538242	0.00623626	0.00550211	2.74576e-05	0.000130269	0.000278473	0.000149692	0.000101251	2.21221e-05	4.244e-05
588	0.00522376	0.00517853	0.00603095	0.00513155	0.00526114	0.00607821	0.00536676	4.01518e-05	9.61164e-05	0.000297606	0.000114036	5.77651e-05	2.84567e-05	5.2829e-05
589	0.00514244	0.00506624	0.00592728	0.0050423	0.00519992	0.0059931	0.00526826	2.33821e-05	9.5093e-05	0.000274398	7.40658e-05	8.37613e-05	3.23095e-05	7.38952e-05
590	0.00503603	0.00497991	0.00580145	0.0049217	0.00508323	0.00587782	0.00515724	1.02224e-05	9.79761e-05	0.000267077	0.000142786	7.85097e-05	7.99314e-06	2.63526e-05
591	0.00503239	0.00494077	0.00576965	0.00489258	0.00504276	0.00582167	0.00510843	3.01253e-05	5.44136e-05	0.000290002	9.56123e-05	5.56863e-05	5.54214e-05	2.07245e-05
592	0.00495165	0.00486277	0.00569525	0.00479658	0.0050095	0.00574221	0.00504874	2.29308e-05	7.70115e-05	0.000302025	7.12302e-05	9.38669e-05	1.63418e-05	5.4204e-05
593	0.00494538	0.00483952	0.0056796	0.00480707	0.00495362	0.00570678	0.00501779	2.85641e-05	6.72448e-05	0.000314966	8.30352e-05	6.85421e-05	1.70775e-06	4.99557e-05
594	0.00491645	0.00482723	0.00563185	0.00476925	0.00492684	0.00565682	0.00498169	2.78244e-05	7.57542e-05	0.000298953	9.88373e-05	5.35994e-05	3.08821e-05	3.05209e-05
595	0.00490467	0.00480735	0.00561402	0.00473664	0.0049297	0.00565772	0.00498344	1.50492e-05	8.21084e-05	0.000316653	8.72113e-05	6.10922e-05	2.29619e-05	4.04327e-05
596	0.0049037	0.00481794	0.00565409	0.00474231	0.00493107	0.00565463	0.00497607	3.95219e-05	7.10418e-05	0.000282272	9.04549e-05	5.11535e-05	5.69182e-06	3.83891e-05
597	0.00490329	0.00484039	0.00560823	0.00474627	0.00491907	0.00568498	0.00495305	1.78027e-05	9.99686e-05	0.000291213	8.21529e-05	6.12136e-05	1.00014e-05	3.10242e-05
598	0.00491748	0.00480983	0.00561485	0.00473088	0.0049369	0.00565515	0.00496514	4.76709e-05	6.902e-05	0.000273604	8.11773e-05	6.16307e-05	4.03926e-05	5.23616e-05
599	0.00490213	0.00481183	0.00563287	0.00471458	0.00495348	0.00566638	0.00499326	2.84989e-05	8.96899e-05	0.000286432	7.19607e-05	7.70925e-05	5.43411e-06	2.06279e-05
600	0.00492058	0.00483897	0.00566214	0.00478719	0.00494277	0.00567237	0.00500324	5.95493e-05	5.78021e-05	0.000298694	9.31336e-05	5.99944e-05	1.49065e-05	4.70738e-05
601	0.00468303	0.00465902	0.0053705	0.0045398	0.00471802	0.00543476	0.00474848	2.20697e-05	8.82855e-05	0.000292085	7.91459e-05	5.73031e-05	3.25534e-05	2.33242e-05
602	0.0046634	0.00460385	0.00537503	0.00453615	0.00471746	0.00540494	0.00476552	1.34234e-05	6.19371e-05	0.000278094	8.22642e-05	3.76666e-05	2.96919e-05	4.99533e-05
603	0.00467258	0.00459239	0.00537765	0.00451896	0.00472274	0.00541754	0.00477914	5.11352e-05	7.70267e-05	0.000263385	5.82261e-05	7.32476e-05	2.58714e-05	5.1135e-05
604	0.00465337	0.00457323	0.00534557	0.00450683	0.00467826	0.00538107	0.00473188	1.61331e-05	6.92776e-05	0.000280932	6.37283e-05	6.63215e-05	2.27647e-05	6.42283e-05
605	0.00459893	0.00454538	0.00531053	0.00450796	0.00464964	0.0053255	0.00471345	1.40853e-05	7.86611e-05	0.000288565	8.63918e-05	7.5814e-05	2.95423e-05	6.09134e-05
606	0.00456177	0.0045294	0.00526289	0.00445273	0.00463241	0.00531512	0.00465319	2.06858e-05	8.41516e-05	0.000248518	9.23887e-05	5.50527e-05	2.78437e-05	3.78338e-05
607	0.00449668	0.00446399	0.00520109	0.00443599	0.00455463	0.00525099	0.00463667	5.96537e-06	9.54675e-05	0.000253438	9.32638e-05	8.70471e-05	1.90893e-05	3.52289e-05
608	0.0044336	0.0043894	0.00515605	0.00438312	0.00450034	0.00514541	0.00455161	2.46451e-05	6.92319e-05	0.000221017	8.16468e-05	7.04766e-05	8.74316e-06	6.4324e-05
609	0.00437243	0.00434407	0.00501952	0.0043017	0.00443491	0.00507273	0.00448714	1.73617e-05	8.25664e-05	0.000234033	9.00536e-05	7.21481e-05	1.83107e-05	4.50463e-05
610	0.0042812	0.0042259	0.00494835	0.00421259	0.00434645	0.00501485	0.00446403	8.60666e-06	6.42414e-05	0.000240086	8.1399e-05	7.37822e-05	1.71705e-05	4.18389e-05
611	0.00422191	0.00416321	0.00486617	0.00412298	0.00425943	0.00489169	0.0043456	1.35149e-05	6.99945e-05	0.000251809	0.000116766	6.33834e-05	2.04701e-05	4.42684e-05
612	0.00410822	0.00406103	0.00474833	0.00405637	0.00414696	0.00483277	0.00422995	1.88591e-05	6.95736e-05	0.000230677	7.93651e-05	6.86164e-05	1.16614e-05	5.02582e-05
613	0.00401867	0.00397035	0.00458593	0.00397557	0.0040414	0.00464951	0.00412561	3.53179e-05	7.97761e-05	0.000220161	9.19601e-05	4.87368e-05	3.10923e-05	2.4559e-05
614	0.00394225	0.00386822	0.0045215	0.00387895	0.00398966	0.00456082	0.00406883	2.568e-05	4.43588e-05	0.00022154	8.00783e-05	6.44712e-05	1.314e-05	5.52606e-05
615	0.00383382	0.00379416	0.00442786	0.00379946	0.00386081	0.00441651	0.00397056	4.3359e-06	5.40588e-05	0.000222251	7.04692e-05	5.66217e-05	2.64798e-05	7.13056e-05
616	0.00373616	0.0036682	0.00425744	0.00366983	0.00374067	0.00431028	0.00384189	1.59589e-05	7.16628e-05	0.000217058	6.04998e-05	1.90376e-05	4.47716e-05	4.69933e-05
617	0.00362387	0.00358663	0.0041759	0.00358168	0.00365175	0.00420822	0.00377917	1.47128e-05	6.19602e-05	0.000193216	2.61729e-05	4.91408e-05	2.39533e-05	5.33045e-05
618	0.00351994	0.00346059	0.00402984	0.00347714	0.00353563	0.0040795	0.00365078	4.51255e-05	5.95219e-05	0.000213531	6.25647e-05	4.6919e-05	9.38741e-06	2.35871e-05
619	0.00343245	0.00337608	0.00388941	0.00336821	0.003435	0.00393528	0.0035181	9.96671e-06	3.96181e-05	0.000192629	5.88661e-05	4.16326e-05	2.37316e-05	2.64597e-05
620	0.00328351	0.00325649	0.00377394	0.00324297	0.00332471	0.00380034	0.00343626	1.63962e-05	6.24011e-05	0.000180773	5.53381e-05	4.48381e-05	1.07102e-05	5.72777e-05
621	0.00321383	0.00320149	0.00368316	0.00321017	0.00323843	0.00370723	0.00335975	3.01522e-05	4.86171e-05	0.000179511	6.5188e-05	4.28958e-05	1.06511e-05	4.41458e-05
622	0.00313375	0.00306898	0.00353269	0.00308788	0.00313733	0.00359116	0.00324409	2.37911e-05	4.6638e-05	0.000175307	3.73686e-05	1.54008e-05	2.29371e-05	3.00014e-05
623	0.00302469	0.00299906	0.00344862	0.00298281	0.00305174	0.00347338	0.003095	1.8562e-05	5.43848e-05	0.000153747	3.72652e-05	3.0205e-05	2.65473e-05	4.7017e-05
624	0.00293712	0.00289884	0.00332079	0.00289906	0.00295803	0.00334588	0.00303203	8.73988e-06	2.56606e-05	0.000151158	3.57435e-05	3.5983e-05	1.74725e-05	3.71277e-05
625	0.00286341	0.00282369	0.00325289	0.00283291	0.00290221	0.00325818	0.00296976	1.27446e-05	4.00557e-05	0.000109058	3.85995e-05	4.25159e-05	2.41699e-05	2.26781e-05
626	0.00281411	0.00275878	0.00316113	0.00276234	0.00283988	0.0031639	0.00287529	1.35754e-05	3.15845e-05	0.000138978	5.54871e-05	3.66319e-05	3.09292e-05	2.85995e-05
627	0.00274087	0.00271864	0.00306659	0.00272267	0.00277938	0.00309159	0.00282873	1.32256e-05	4.48549e-05	0.000120819	5.36178e-05	3.6825e-05	1.9645e-05	4.82129e-05
628	0.002691	0.00269163	0.00300178	0.00264476	0.00271988	0.0030087	0.00276713	2.44477e-05	5.97438e-05	9.45667e-05	2.92192e-05	3.95445e-05	1.20142e-06	4.19993e-05
629	0.00266156	0.00263897	0.00291343	0.00260038	0.00267437	0.00294167	0.00270989	2.6606e-05	2.53173e-05	0.000100842	2.65174e-05	2.11937e-05	1.39212e-05	1.41597e-05
630	0.00264092	0.00263588	0.00285809	0.00258252	0.00264436	0.00288994	0.00267407	2.35675e-05	2.96298e-05	8.0563e-05	2.61172e-05	4.6965e-05	3.42197e-05	2.07494e-05
631	0.00260844	0.00259671	0.00282728	0.00256286	0.00263435	0.0028326	0.00262559	2.16813e-05	1.36605e-05	5.82643e-05	2.78448e-05	1.77636e-05	2.73221e-05	1.61736e-05
632	0.00263789	0.00262602	0.00278977	0.00255502	0.00264325	0.0028322	0.00264376	2.5553e-05	2.07224e-05	6.5798e-05	2.5136e-05	2.98349e-05	4.08038e-05	3.01359e-05
633	0.00263556	0.00261842	0.00277788	0.00255952	0.00264767	0.00277944	0.00264412	2.35913e-05	2.13568e-05	4.71725e-05	2.36867e-05	2.03913e-05	1.29997e-05	2.15094e-05
634	0.00266762	0.00266318	0.00278687	0.00258292	0.00268529	0.00280446	0.00265104	2.15361e-05	2.33857e-05	3.1497e-05	3.18836e-05	2.57701e-05	2.37628e-05	5.03417e-05
635	0.00275939	0.00270468	0.00280089	0.00261101	0.002716	0.00278353	0.00269204	2.70404e-05	2.34234e-05	2.75514e-05	3.66235e-05	2.48876e-05	2.21808e-05	1.78458e-05
636	0.00284324	0.00277469	0.00280846	0.00267231	0.00277783	0.00282296	0.00271572	4.31179e-05	2.27381e-05	1.59897e-05	3.94128e-05	2.10259e-05	3.02715e-05	4.56065e-05
637	0.00290522	0.00289202	0.00288494	0.00274854	0.00291522	0.00286584	0.00281926	3.19273e-05	2.50716e-05	3.03161e-05	3.89974e-05	1.12792e-05	2.38457e-05	3.87101e-05
638	0.0030097	0.00299098	0.00290857	0.00283035	0.00299733	0.0029364	0.00289797	9.60872e-06	3.06163e-05	2.60319e-05	4.50863e-05	9.59236e-06	1.60355e-05	4.6057e-05
639	0.00314366	0.003126	0.00299267	0.00298249	0.00313753	0.00301272	0.00302417	1.44444e-05	2.58176e-05	6.76684e-05	6.09676e-05	2.16714e-05	2.1312e-05	6.58343e-05
640	0.00334669	0.00330117	0.00307903	0.00310426	0.00327128	0.00308844	0.00314098	5.34752e-05	3.49433e-05	5.16987e-05	4.29582e-05	1.59823e-05	1.39553e-05	8.68512e-05
641	0.00349976	0.00349179	0.00322516	0.00324325	0.00342635	0.00321355	0.00328777	5.45282e-05	4.77764e-05	0.000105606	4.30168e-05	3.95557e-05	4.99203e-06	6.84996e-05
642	0.00371981	0.00368971	0.00333505	0.00343794	0.00367457	0.00331575	0.00349744	7.44372e-05	1.67044e-05	0.00014644	4.2536e-05	1.87561e-05	1.98455e-05	8.84932e-05
643	0.0039364	0.00394399	0.00348354	0.0036786	0.00390343	0.00346683	0.00367792	2.37859e-05	4.84925e-05	0.000156216	6.6624e-05	1.29216e-05	2.63614e-05	9.68055e-05
644	0.00419913	0.00419333	0.00365106	0.00386602	0.00411424	0.00364431	0.00392766	2.486e-05	5.66934e-05	0.00021616	8.72349e-05	7.72962e-05	2.99147e-05	0.000131637
645	0.00440933	0.00442243	0.00379175	0.00410092	0.00435008	0.00377176	0.00409587	2.46157e-05	5.58662e-05	0.000190893	8.03217e-05	6.35721e-05	3.89577e-05	0.000114142
646	0.0047025	0.00472849	0.00400312	0.00436438	0.00463822	0.00399302	0.00440824	3.0556e-05	7.37849e-05	0.000270953	9.73163e-05	3.82946e-05	2.30129e-05	0.000129397
647	0.00504112	0.0050513	0.00424742	0.00468102	0.0049353	0.00422435	0.00467043	2.80861e-05	8.34428e-05	0.000299693	0.000121355	6.8886e-05	1.81297e-05	0.00014746
648	0.00540932	0.00539723	0.00449071	0.00502532	0.00527726	0.00441876	0.00497774	1.89629e-05	0.000114988	0.00030601	8.83299e-05	6.56212e-05	3.5293e-05	0.000140474
649	0.00559083	0.00562419	0.00464816	0.00527035	0.00548011	0.00461269	0.00520251	2.58694e-05	0.000107191	0.000327817	0.000107257	5.00802e-05	7.76883e-06	0.00015089
650	0.00594604	0.00600323	0.00486396	0.00559937	0.00586026	0.00485168	0.00554662	3.10336e-05	0.000113343	0.000398894	9.74321e-05	9.09053e-05	2.87162e-05	0.00011866
651	0.0063146	0.00635929	0.00516623	0.00596898	0.00621867	0.00505884	0.00586772	3.57743e-05	0.00012902	0.000444227	0.00011756	8.45801e-05	4.24826e-05	0.000211313
652	0.00659963	0.00667435	0.0053138	0.00627616	0.00644958	0.00525162	0.00615257	2.05783e-05	0.000181	0.000452454	0.000131014	0.000145875	2.68916e-05	0.00016365
653	0.00692917	0.00694251	0.00554169	0.00657045	0.00675697	0.00548842	0.00642095	4.5275e-05	0.00013307	0.000442734	8.96609e-05	7.55437e-05	2.23918e-05	0.000185759
654	0.0072043	0.00730343	0.00582222	0.00693663	0.007082	0.00574726	0.00679083	3.24132e-05	0.000170266	0.000529522	0.000154473	0.000117916	6.87567e-06	0.000150746
655	0.00751143	0.00763199	0.00604869	0.00730324	0.0073758	0.00592173	0.00702311	1.68726e-05	0.000168744	0.000574581	0.000149857	0.000118421	5.59199e-05	0.000200282
656	0.00779101	0.00790956	0.00625399	0.00755936	0.00772044	0.00613699	0.00736152	1.47004e-05	0.000155266	0.00055229	0.000180221	9.62952e-05	3.2621e-05	0.000206649
657	0.00803885	0.00813639	0.0063427	0.0078208	0.00783307	0.0062815	0.00756164	5.52247e-05	0.000200442	0.000600009	0.000160575	0.000140979	3.35571e-05	0.00016299
658	0.00820255	0.00838284	0.00655855	0.0081028	0.00807336	0.00640823	0.0078246	5.42355e-05	0.000201735	0.000637886	0.000170356	0.000141499	3.15009e-06	0.000137085
659	0.00841004	0.00856317	0.00665663	0.00830749	0.00827013	0.00652009	0.00804804	7.90943e-05	0.000144839	0.000645467	0.000160174	0.000135619	6.44794e-05	0.000137896
660	0.00856282	0.00872315	0.00675247	0.00851389	0.00841494	0.00664488	0.00818734	0.000124025	0.000152102	0.000680571	0.000167915	0.000153675	6.17632e-05	0.000157084
661	0.0086211	0.00886004	0.00684571	0.00868708	0.00849001	0.00674115	0.00826962	6.21487e-05	0.000157852	0.000664345	0.000177364	0.000136003	3.05038e-05	0.000159213
662	0.00869845	0.008909	0.00680686	0.00883039	0.00858463	0.00673433	0.00838526	0.000109158	0.000159137	0.000702409	0.000147439	0.000147169	4.08712e-05	0.000137199
663	0.00870053	0.00888179	0.00691048	0.00886173	0.00854116	0.00677232	0.00846337	0.000102102	0.000187255	0.000678782	0.000176769	0.000148681	2.62501e-05	0.000123286
664	0.00876091	0.00892352	0.00683757	0.00893608	0.00859209	0.00674077	0.00848619	0.000128121	0.000201018	0.000688286	0.000231668	0.000154595	4.85422e-05	0.000116392
665	0.0086201	0.00881946	0.00685225	0.00894626	0.00858569	0.00670704	0.00845933	0.000111057	0.000185942	0.000701094	0.000180671	0.00014198	1.20334e-05	9.21852e-05
666	0.00857211	0.00878728	0.00676019	0.00893869	0.00845755	0.00665825	0.00842458	7.79356e-05	0.000144303	0.000729366	0.000229127	0.000150376	6.4011e-05	7.3018e-05
667	0.00846403	0.00863005	0.00667069	0.00889715	0.0083699	0.00653697	0.00836128	0.000133957	0.000163698	0.000674879	0.000200044	0.000225663	1.279e-05	7.4349e-05
668	0.0082922	0.00852267	0.0065933	0.00874318	0.00824312	0.00640424	0.00819715	0.000144807	0.000182226	0.000669741	0.000263791	0.000205303	8.00057e-05	5.39569e-05
669	0.00812363	0.00833087	0.00638219	0.00865639	0.00804912	0.00629718	0.00806365	0.000108311	0.000183218	0.000672733	0.000260907	0.0001966	3.06295e-06	4.1749e-05
670	0.00790847	0.0081353	0.00629069	0.00847402	0.00785468	0.00620544	0.00792884	9.36751e-05	0.000187897	0.000682631	0.000235331	0.000192962	2.27747e-05	7.03601e-05
671	0.00767417	0.0079182	0.00609134	0.00824676	0.00761973	0.00599083	0.00772919	7.72964e-05	0.000171158	0.000664158	0.000233989	0.000180445	1.07501e-05	5.57896e-05
672	0.00747112	0.00770533	0.00597811	0.00818807	0.00751853	0.00587993	0.0075887	0.000130995	0.000171309	0.000624535	0.000241819	0.00016778	1.45214e-05	4.54268e-05
673	0.00725409	0.00748741	0.00580424	0.00795268	0.00724969	0.00568897	0.00737113	6.91124e-05	0.000153728	0.000608534	0.000214497	0.000151239	4.47406e-05	5.52304e-05
674	0.00702292	0.00726487	0.00557904	0.00774973	0.00702365	0.00549607	0.0071687	6.14309e-05	0.000148423	0.000569729	0.00025631	0.000186501	4.15896e-05	4.06163e-05
675	0.00678867	0.00699579	0.00536167	0.00750087	0.00676395	0.00530854	0.00685178	5.13929e-05	0.000185169	0.000595514	0.000190989	0.000228456	2.71782e-05	9.5577e-05
676	0.00651036	0.00671872	0.00521152	0.0072669	0.00656732	0.00513718	0.00664601	6.5328e-05	0.000110982	0.000583868	0.00020435	0.000119376	2.26299e-05	3.84062e-05
677	0.00625166	0.00646894	0.00501745	0.00698723	0.00631031	0.00496854	0.00643913	5.6745e-05	0.000132779	0.000596396	0.000200469	0.000170636	1.83417e-05	9.87234e-05
678	0.00606991	0.00624377	0.00482839	0.0067705	0.00606698	0.00476122	0.00612305	6.95104e-05	0.000141809	0.000523496	0.000223956	0.000162083	3.51074e-05	6.34341e-05
679	0.00572757	0.00596154	0.00463574	0.00649757	0.00579993	0.00452718	0.00591472	5.03158e-05	0.000127513	0.000511914	0.000189652	0.000155754	7.82158e-05	9.56837e-05
680	0.0054715	0.00568814	0.00442053	0.00625543	0.00553718	0.00434203	0.00565512	3.55042e-05	0.000127078	0.000478064	0.000179031	0.0001596	8.59055e-06	8.88948e-05
681	0.00527423	0.00542671	0.00420511	0.00599832	0.0052873	0.00417992	0.00536858	2.90532e-05	0.000105109	0.000449441	0.000173782	0.00012738	6.49772e-05	9.57013e-05
682	0.00510236	0.005249	0.00409574	0.00575357	0.00507373	0.0040332	0.00519053	5.56274e-05	9.63261e-05	0.000420534	0.00015917	0.000132837	6.02403e-05	7.21772e-05
683	0.00483888	0.00499319	0.00390997	0.00556966	0.00487377	0.00386467	0.00499929	4.60199e-05	0.000122076	0.000431851	0.000159893	0.000132191	1.77605e-05	2.82574e-05
684	0.00457529	0.00475701	0.00374801	0.00528533	0.0046191	0.00368635	0.00470984	2.23175e-05	9.77073e-05	0.000407705	0.000180166	6.85318e-05	7.51614e-05	3.25937e-05
685	0.00443598	0.00454855	0.00361979	0.00509593	0.00447113	0.00354039	0.00455851	6.53443e-05	7.30427e-05	0.000382916	0.000135733	7.04086e-05	5.61435e-05	6.0514e-05
686	0.00421842	0.00434659	0.0034433	0.00489285	0.00424886	0.00340721	0.00435202	2.58853e-05	7.04763e-05	0.00037265	0.000124437	0.000107987	4.46492e-05	6.34479e-05
687	0.00400318	0.00416168	0.00329201	0.00463774	0.00408091	0.00324321	0.00411899	1.22601e-05	7.57151e-05	0.000346368	0.000143794	8.77302e-05	7.87924e-05	7.03291e-06
688	0.00386374	0.00397647	0.00311871	0.00441248	0.00387699	0.00308348	0.00398398	2.7071e-05	6.31781e-05	0.000319597	0.000123498	8.59837e-05	4.33645e-05	5.49333e-05
689	0.00367443	0.00378311	0.00297497	0.00422493	0.00367905	0.00294819	0.00378945	2.12764e-05	6.97201e-05	0.000342165	0.000121074	7.17121e-05	6.6084e-05	5.58181e-05
690	0.00347139	0.00359065	0.00283488	0.00403136	0.00349025	0.0027867	0.00358893	3.57084e-05	5.56618e-05	0.000325654	8.4786e-05	5.84479e-05	2.16892e-05	5.81059e-05
691	0.00336353	0.00347622	0.00276824	0.00388577	0.00339371	0.00271387	0.00351774	5.57581e-05	5.38398e-05	0.000300496	0.000110486	5.04497e-05	6.53167e-05	1.32011e-05
692	0.00321166	0.00327406	0.00262283	0.00371148	0.00322548	0.00257996	0.00329083	5.41269e-05	5.75368e-05	0.000265609	0.000153427	3.71927e-05	5.26545e-05	2.68781e-05
693	0.00310203	0.00319852	0.00252261	0.00353828	0.00306913	0.00247562	0.00317245	3.95962e-05	4.38743e-05	0.000263643	9.3915e-05	5.16076e-05	4.71897e-05	3.80402e-05
694	0.00294693	0.0030397	0.00238803	0.00337151	0.00298074	0.00236463	0.00303019	2.51589e-05	5.31583e-05	0.000250558	9.795e-05	4.63198e-05	2.85356e-05	1.73057e-05
695	0.00286844	0.0029375	0.00232372	0.00322561	0.00284282	0.00227167	0.00289604	3.5238e-05	3.51694e-05	0.000245253	9.26857e-05	4.74135e-05	1.8615e-05	9.2947e-06
696	0.00271698	0.0027825	0.00221702	0.00306949	0.00271009	0.00217884	0.0027942	3.50244e-05	3.6961e-05	0.000209502	9.08306e-05	3.19499e-05	3.04704e-05	1.29703e-05
697	0.00262619	0.00269466	0.00210063	0.00297542	0.00262008	0.00211199	0.00271114	1.79925e-05	4.50815e-05	0.000210657	7.5228e-05	3.06258e-05	4.71522e-05	3.07181e-05
698	0.00255556	0.00259665	0.00206574	0.00288168	0.00255567	0.00205436	0.00260061	2.7718e-05	3.75095e-05	0.000217415	5.58969e-05	3.20484e-05	3.24076e-05	4.74897e-05
699	0.00248979	0.0025436	0.00197387	0.00276608	0.002451	0.00198759	0.00248338	5.79961e-05	4.2643e-05	0.000195324	8.41356e-05	2.75914e-05	2.34841e-05	1.05824e-05
700	0.00239862	0.00247606	0.0019374	0.00268027	0.00238466	0.00192729	0.00246387	4.53513e-05	2.91164e-05	0.000189874	6.42592e-05	2.92233e-05	1.79972e-05	5.7703e-05
701	0.00234911	0.00239167	0.00188775	0.00260686	0.00234057	0.00186081	0.00236422	2.40486e-05	4.28042e-05	0.000195804	4.54622e-05	3.28368e-05	2.62791e-05	5.47015e-05
702	0.00232572	0.00235333	0.00185766	0.00254422	0.00229923	0.00185729	0.00231185	2.54802e-05	5.82939e-05	0.000176955	5.70675e-05	3.49474e-05	2.11021e-05	1.18924e-05
703	0.00227697	0.00229582	0.0018188	0.00248765	0.00225791	0.00179612	0.00228634	1.53299e-05	4.02088e-05	0.000193841	5.53197e-05	3.8485e-05	3.37303e-05	5.49672e-06
704	0.00223795	0.00226298	0.00180096	0.00248911	0.00221596	0.00177222	0.00225404	3.0012e-05	4.65421e-05	0.000178158	9.47074e-05	4.6413e-05	4.72922e-05	7.07062e-06
705	0.00222054	0.00222751	0.00174904	0.00242607	0.00217903	0.00174133	0.00222117	2.90952e-05	4.95292e-05	0.000186437	5.41096e-05	5.42209e-05	9.73233e-06	7.37747e-06
706	0.00219828	0.00221737	0.00174673	0.00238478	0.00211795	0.00172878	0.00216204	8.81834e-06	5.76615e-05	0.000189859	5.61186e-05	3.52556e-05	4.33581e-05	1.31492e-05
707	0.002137	0.00218385	0.00172938	0.00232085	0.00211579	0.00165692	0.00210737	3.91433e-05	4.34883e-05	0.000185848	4.18916e-05	5.62566e-05	2.07975e-05	4.41952e-05
708	0.0021117	0.00217596	0.00167869	0.00227585	0.00208313	0.00167738	0.00211557	2.66451e-06	3.68716e-05	0.000176997	5.16205e-05	4.1462e-05	3.53838e-05	2.55462e-05
709	0.00206645	0.00211345	0.0016552	0.00225142	0.00207051	0.00163915	0.00207588	3.34837e-05	5.02753e-05	0.000154519	5.11238e-05	3.59777e-05	2.63241e-05	2.26364e-05
710	0.00205813	0.00209592	0.00163932	0.0022218	0.00200105	0.00160618	0.00204296	2.51488e-05	4.03609e-05	0.000150781	4.70834e-05	4.55739e-05	1.08219e-05	1.98771e-05
711	0.00203061	0.00205435	0.00160731	0.00220148	0.00198464	0.00160092	0.00198972	3.38809e-05	6.04541e-05	0.000177835	4.86773e-05	4.84766e-05	3.99673e-05	2.40631e-05
712	0.00200246	0.00205294	0.00160769	0.00213236	0.00198009	0.0015699	0.00198579	5.69398e-05	3.65415e-05	0.000157491	3.57682e-05	4.81362e-05	2.23399e-05	2.6829e-05
713	0.00198042	0.0020101	0.0015588	0.00210166	0.0019521	0.00153079	0.00195907	5.33309e-06	4.03846e-05	0.000152682	5.49712e-05	4.12997e-05	1.71638e-05	2.34649e-05
714	0.00195417	0.00197935	0.00154824	0.00209839	0.00191514	0.00152168	0.00190911	2.5337e-05	4.05872e-05	0.000180174	4.13905e-05	3.22178e-05	1.13017e-05	1.69027e-05
715	0.00193505	0.00196118	0.00153657	0.00205744	0.00190536	0.0014808	0.00190414	2.36171e-05	4.07591e-05	0.000161175	5.04717e-05	4.98524e-05	1.00431e-05	1.35648e-05
716	0.00190586	0.00192797	0.00149716	0.00203312	0.0018897	0.00148909	0.00188193	2.1112e-05	4.08042e-05	0.000142086	4.31886e-05	4.41212e-05	3.13084e-05	1.62394e-05
717	0.00186331	0.00190635	0.00146009	0.00198832	0.00185011	0.00146326	0.00186119	3.72388e-05	3.65672e-05	0.000155883	4.15722e-05	3.25463e-05	1.33323e-05	1.59395e-05
718	0.001847	0.00188286	0.00146441	0.00198779	0.00183491	0.00146601	0.00184315	2.17047e-05	2.64742e-05	0.000141819	5.82218e-05	4.99612e-05	1.72972e-05	1.82682e-05
719	0.00184603	0.0018591	0.00146005	0.00195291	0.00181021	0.00142615	0.00182183	3.00533e-05	2.90403e-05	0.000142779	3.98314e-05	3.64092e-05	2.60262e-05	1.82259e-05
720	0.00180793	0.00184708	0.0014458	0.00191221	0.00178215	0.00139151	0.00178647	1.67429e-05	4.63576e-05	0.000153486	7.02139e-05	3.33806e-05	9.16779e-06	1.56352e-05
721	0.00179745	0.00181993	0.00142215	0.0019006	0.00176029	0.00138256	0.00178084	4.39643e-05	3.62632e-05	0.000149373	5.06317e-05	3.84994e-05	2.00739e-05	1.31561e-05
722	0.00176376	0.00180721	0.00139289	0.00187867	0.00173854	0.00138254	0.00176398	2.62477e-06	3.55783e-05	0.000138426	4.62497e-05	2.77866e-05	1.29123e-05	3.1188e-05
723	0.00173759	0.00176365	0.00138807	0.00185017	0.00172579	0.00136202	0.0017282	4.92221e-05	3.49477e-05	0.000144365	3.87476e-05	3.8486e-05	3.29216e-05	2.82685e-05
724	0.00172935	0.00176759	0.0013491	0.00182999	0.0016907	0.00130879	0.00170457	4.20793e-05	1.89752e-05	0.000121833	4.00335e-05	4.0728e-05	1.7778e-05	3.37338e-05
725	0.00170558	0.0017243	0.00132729	0.00179131	0.00166507	0.00130474	0.0016955	3.14415e-05	3.45978e-05	0.000125778	5.40597e-05	2.69902e-05	1.7825e-05	3.22254e-05
726	0.00167991	0.00169188	0.00130494	0.00175862	0.00163285	0.00126328	0.00167761	4.10047e-05	3.88935e-05	0.000141727	4.39244e-05	1.35638e-05	2.83863e-05	2.70266e-05
727	0.00164915	0.00168618	0.00129573	0.0017497	0.00161419	0.00127401	0.00163742	1.6255e-05	2.1152e-05	0.000131145	3.49729e-05	3.99387e-05	1.20916e-05	1.02295e-05
728	0.00161282	0.00165449	0.00125861	0.00171728	0.0015725	0.00123244	0.00159609	3.10725e-05	3.85487e-05	0.00013174	5.2024e-05	5.49352e-05	1.62463e-05	2.3264e-05
729	0.00158493	0.00161757	0.00125109	0.00168573	0.00156379	0.00119442	0.00159229	2.85411e-05	3.90517e-05	0.00013946	3.96106e-05	3.01003e-05	1.98737e-05	1.95399e-05
730	0.00154647	0.00157341	0.00122304	0.00163734	0.00153781	0.00119485	0.00154379	2.31404e-05	2.90882e-05	0.000134858	5.14766e-05	2.68191e-05	2.5548e-05	2.79785e-05
731	0.00152143	0.001557	0.00120473	0.00162111	0.00150985	0.00116519	0.00154396	1.53533e-05	4.58131e-05	0.000108176	3.46674e-05	3.29074e-05	2.3667e-05	1.06953e-05
732	0.0014804	0.00150734	0.00116899	0.00159994	0.00148869	0.00113688	0.0014812	2.75279e-05	4.5503e-05	0.000118482	3.89612e-05	3.27166e-05	2.94247e-05	1.47444e-05
733	0.00144425	0.00149213	0.00115072	0.00156518	0.00142942	0.00112142	0.00145974	3.07052e-05	4.60166e-05	0.000124616	5.13924e-05	5.52222e-05	1.39423e-05	2.87591e-05
734	0.00141273	0.00147134	0.00109634	0.00153138	0.00138982	0.00109697	0.00143525	1.72105e-05	3.93289e-05	0.000123133	5.27393e-05	3.68208e-05	2.54144e-05	2.08886e-05
735	0.00139991	0.00143635	0.00109803	0.00150314	0.00139308	0.00107466	0.00138189	1.62502e-05	3.59116e-05	0.000116737	4.96002e-05	4.12932e-05	9.80978e-06	9.65676e-06
736	0.00132899	0.00137409	0.00106449	0.00146594	0.00134227	0.00103587	0.00136855	1.11058e-05	3.56889e-05	0.000122432	3.9183e-05	3.95901e-05	1.2033e-05	2.33252e-05
737	0.00131127	0.00133499	0.00104749	0.00142163	0.0013039	0.00100295	0.00132584	2.82639e-05	3.45068e-05	0.000101285	4.48401e-05	4.99233e-05	1.44952e-05	2.81434e-05
738	0.0012866	0.00130631	0.00101253	0.00138654	0.0012608	0.000989383	0.00129602	1.91671e-05	2.87074e-05	0.000109171	6.9096e-05	4.31839e-05	7.34484e-06	1.1733e-05
739	0.00126072	0.00127042	0.000998826	0.00136649	0.00124551	0.000960332	0.00127525	1.57807e-05	4.70077e-05	0.000106615	3.78518e-05	5.74138e-05	9.03994e-06	1.47347e-05
740	0.00120826	0.00124642	0.000954778	0.00132851	0.00119591	0.000931392	0.00122268	1.56975e-05	5.70056e-05	9.46998e-05	5.3735e-05	3.09287e-05	1.42918e-05	1.32209e-05
