# Supplementary material for: Nucleosome-CHD4 chromatin remodeler structure maps human disease mutations
Source: eLife journal article supplement (doi:10.7554/elife.56178), 2020-06-16
Supplement: supp [file elife-56178-supp-v1.zip]

CHD4/706-1230 1790 VD-----PTVKYERQPEYLDA-TGGTLHPYQMEGLNWLRFSAWAQGTDTILADEMGLGKTIVQTAVFLYSLYKEGHSKGPFLVSAPLSTIIINW 790  
CHD5/680-1204 1764 VD-----PTVKFDKQWPWYIDS-TGGTLHPYQLEGLNWLRFSAWAQGTDTILADEMGLGKTIVQTIVFLYSLYKEGHSKGPFLVSAPLSTIIINW 764  
CHD3/716-1240 1716 ND-----PTVKYETQPRFITA-TGGTLHMYQLEGLNWLRFSAWAQGTDTILADEMGLGKTIVQTIVFLYSLYKEGHTKGPFLVSAPLSTIIINW 800  
CHD1/460-980 1460 RP-----RFVALKKQPSYIGGHEGLELRDYLQNLGNLWLHAHWCNKGNSCILADEMGLGKTIVQTIVFLNYLFHEHQLYGPFLLVPLSTLTLSW 545  
CHD2/464-983 1464 RP-----RFVALKKQPAYLGG-ENLELRDYLQLEGLNWLHAHWCNNSVILADEMGLGKTIVQTIVFLSYLFHQHQLYGPFLIVVPLSTLTLSW 548  
Chd1/358-880 1358 RP-----RFEKLSVQPPFIKG---GELRDYFQLTGINWMAFLWSKGDNGILADEMGLGKTIVQTIVAFISWLIIFARRQNGPHIIVVPLSTMPAW 440  
Isw1/181-686 181-----IEFQFSRESPAYVNG---QLRPPYQIQGVNWLVS LHKNKIAGILADEMGLGKTIVQTIVSFLGYLRYIEKIPGPFLVIAPKSTLNNW 260  
Snf2/742-1268 1268 VDYYNVAHRIKEDIKQPSILVGV---GTLKDQYIKGLGMVSLFNNHLNGILADEMGLGKTIVQTIVSLTLYEMKNIRGPFLVIVPLSTLSNFW 831  
CHD6/443-967 1443 SD-----SWQKLEKSREYKNS---NQLRREYQLEGMNWLFLNWNRNKNCILADEMGLGKTIVQTIVFLSEIF-LRGIHGPFLLIIAPLSTITNW 524  
CHD7/950-1475 1475 AD-----DWKKSSESSREYKNN---NKLREYQLEGMNWLFLNWNMRNCILADEMGLGKTIVQTIVFLYEIY-LKGIHGPFLLIIAPLSTIPNW 1031  
CHD9/842-1367 1367 SN-----IWKIDQSDRYKNG---NQLRREYQLEGLNWLFLNWNRRNCILADEMGLGKTIVQTIVFLYEIY-LTGIHGPFLLIIAPLSTIANW 923  
CHD8/793-1318 1318 AS-----AWKKLELSHEYKNR---NQLRREYQLEGMNWLFLNWNRRNCILADEMGLGKTIVQTIVFLQEVY-NVGIHGPFLLIIAPLSTITNW 874

I (Walker A, P-loop)

Ia

CHD4/706-1230 1230 EREFEMWAPDMYVVTYVGDKDSRAIIRENEFSFEDNIRSGKKASRMKKEASVKFHVLLTSYELITIDMAILGSDIWACLIVDEAHLRKNQ 883  
CHD5/680-1204 1204 EREFEMWAPDYFYVVTYGDKESRSVIRENEFSFEDNIRSGKKVFRMKKEVQIKFHVLLTSYELITIDQAILGSIWACLIVDEAHLRKNQ 857  
CHD3/716-1240 1240 EREFQMWAPKFYVVTYTDKDSRAIIRENEFSFEDNIRSGKKAFKMKREAVQKFKHVLLTSYELITIDQAAIGSIRWACLIVDEAHLRKNQ 893  
CHD1/460-980 1460 QREIQTWASQMNNAVYVLDGINSRNMIRTHEWTH-----HQTKRLLKFNILLTYEILLKDKAFLGGLNWAFIGVDEAHLRKNDD 624  
CHD2/464-983 1464 QREFEIIWAPIENVVVYIGDLSRNTIREYEWI-----SQTKRLLKFNILLTYEILLKDKTVLGSINWAFIGVDEAHLRKNDD 627  
Chd1/358-880 1358 LDTFEKWAIDLNCIYMGNQKSRDTRIIEYFYTNPR-----KGGKTMKFNVLITTYEILLKDRAGELSGIKQGFMAVDEAHLRKNDE 523  
Isw1/181-686 1686 LEINRWITPDVNAIFLQGDKEERAEILQ-----KKLLGCDFDVVIASIEYIIREKSLPKKINWEYIIDEAHRIMKNEE 334  
Snf2/742-1268 1268 SSEFAKWAPTLRTISFKGSPNERKAKQ-----AKIRAGEFDVVLITTFEYIYIKERALLSKVKKWHMIDEAHRIMKNEE 904  
CHD6/443-967 1443 EREFRTWT-EMNAIVYHGSQISRQMQQYEMVYRDAQG-----NPLSGVFKFHVVIITTFEMILADCPPELKKIHWSCVIIDEAHLRKNRNC 608  
CHD7/950-1475 1475 EREFRTWT-ELNVVVYHGSQASRRTIQLYEMYFKDPQG-----RVIKGSYKFHAIITTFEMILADCPPELRNIPWRCVIIDEAHLRKNRNC 1115  
CHD9/842-1367 1367 EREFRTWT-ELNVVVYHGSLSISRQMQQYEMYFRDPSQG-----RIIRGAYRFQAIITTFEMILGDCPELNAIEWRCVIIDEAHLRKNK 1007  
CHD8/793-1318 1318 EREFNTWT-EMNTIVYHGSLSISRQMQQYEMYCKDSRG-----RLIPGAYKFDALITTFEMILSDCPELREIEWRCVIIDEAHLRKNRNC 958

Loop (residues 832-837)

Ic

II (Walker B + IIa)

CHD4/706-1230 1230 KFFRVLN-GYSLQHKLLLTGTPLQNNLEELFHLNLFNLTPERFHNLEGFLE-----EFADIAKEQDIKKLHDMLGPHMLRRLK 960  
CHD5/680-1204 1204 KFFRVLN-SYKIDYKLLLTGTPLQNNLEELFHLNLFNLTPERFNNLEGFLE-----EFADISKEQDIKKLHDLGLPHMLRRLK 934  
CHD3/716-1240 1240 KFFRVLN-GYKIDHKLLLTGTPLQNNLEELFHLNLFNLTPERFNNLEGFLE-----EFADISKEQDIKKLHDLGLPHMLRRLK 970  
CHD1/460-980 1460 LLYKTLI-DFKSNHRLIITGTPLQNSLKEWLSLHFIMPEKFSWEDFEE-----EHGK-GREYGYASLHKELEPFLLRRVKK 700  
CHD2/464-983 1464 LLYKTLI-DFKSNHRLIITGTPLQNSLKEWLSLHFIMPEKFEWEDFEE-----DHGK-GRENGYQSLHKKLEPFLLRRVKK 703  
Chd1/358-880 1358 SLYESLN-SFKVANRLIITGTPLQNNIKELAAVNFIMPGRFTIDQEDF-----ENQDEEQEYIHDHRRRIOPFILLRRLK 600  
Isw1/181-686 1686 MLSQVLR-EFTSRNRLIITGTPLQNNLHELWALLNLFLLPDI FSDAQDFDDWFS-----ESTEEQDQKIVKQLHTVLPFLLRRLK 415  
Snf2/742-1268 1268 KLSLTLNTHYHADRYLITGTPLQNNLELWALLNLFVLPKIFNSVQKDFEWFNTPFANTGGQDKILESEETLLVIRRLHKLRLPFLLRRLK 997  
CHD6/443-967 1443 KLLLEGLK-LMALEHKVLLTGTPLQNSVEELFSLNLFLESPFSETAFL-----EFGDLKTEEQVKQLQSLKPFMMRLRLK 685  
CHD7/950-1475 1475 KLLLEGLK-MMDLEHKVLLTGTPLQNTVEELFSLNLFLESPFSETFMQ-----EFGDLKTEEQVKQLQALKPFMMRLRLK 1192  
CHD9/842-1367 1367 KLLLEGLK-LMNLLEHKVLLTGTPLQNTVEELFSLNLFLESPFSETFMQ-----EFGDLKTEEQVKQLQALKPFMMRLRLK 1084  
CHD8/793-1318 1318 KLLDSLK-HMDLEHKVLLTGTPLQNTVEELFSLNLFLESPFSESEFLK-----DFGDLKTEEQVKQLQALKPFMMRLRLK 1035

III

Asn1010

CHD4/706-1230 1230 DVFKNMPSTKELIVRVELSPMKKKYKYILTRNFEALNARGGGNQV---SLLNVVMDLKCCCNHPYLFVPAAMEA-----PKMPNGMYD 1041  
CHD5/680-1204 1204 DVFKNMPAKTELIVRVELSPMKKKYKYILTRNFEALNSKGGGNQV---SLLNIMMDLKCCCNHPYLFVPAAVEA-----PVLPNGSYD 1015  
CHD3/716-1240 1240 DVFKNMPAKTELIVRVELSPMKKKYKYILTRNFEALNSKGGGNQV---SLLNIMMDLKCCCNHPYLFVPAAMES-----PKLPSGAYE 1051  
CHD1/460-980 1460 DVEKSLPAKVQELIRVEMSAQKKYKYKWLTRNYKALSKGSGSTSGFLNIMMELKKCCCNHCYLIK---PPDEN-----NEFYNKQEA 779  
CHD2/464-983 1464 DVEKSLPAKVQELIRVEMSAQKKYKYKWLTRNYKALSKGTRGSTSGFLNIMMELKKCCCNHCYLIK---PPEE-----NERENGQEI 782  
Chd1/358-880 1358 DVEKSLPAKTEELIEVELTNIQKKYYRAILEKNFSLSKGAGHTNM---PNLNTMMELKKCCCNHPYLIK---GAEKILGEFRDYNPAASDFH 1173  
Isw1/181-686 1686 DVETSLPLPKKELNLYVGMSSMKQKWKYKILEKDLDAVNGSNGSKESKTRLLNIMMQLKCCCNHPYLFDF---GAEP-----GPPYTTDE 495  
Snf2/742-1268 1268 DVEKLEPDKVEKVVVKMSALQKQIMYQMLKYRRLIFGDQNNKMMVLRGNNQIMMLKKICCNHPVFVE---EVEDQI-----NPTRETDN 1080  
CHD6/443-967 1443 DVEKNLAPKQETIIEVELTNIQKKYYRAILEKNFSLSKGAGHTNM---PNLNTMMELKKCCCNHPYLIK---GAEKILEDFRKTHTSPADPDF 774  
CHD7/950-1475 1475 DVEKNLAPKEETIIEVELTNIQKKYYRAILEKNFSLSKGAGHTNM---PNLNTMMELKKCCCNHPYLIK---GAEKILEEFKETHNASPDF 1281  
CHD9/842-1367 1367 DVEKNLAPKEETIIEVELTNIQKKYYRAILEKNFSLSKGAGHTNM---PNLNTMMELKKCCCNHPYLIK---GAEKILEEFKETHNASPDF 1281  
CHD8/793-1318 1318 DVEKNLAPKQETIIEVELTNIQKKYYRAILEKNFSLSKGAGHTNM---PNLNTMMELKKCCCNHPYLIK---GAEKILETFEACHIIIPHDFH 1124

Arg1127

CHD4/706-1230 1230 GSALIRASGKLLLLQKMLKNLKEGGHRLVIFSQMTKMLDLLEDFLIEHEGYKYERIDGGITGNMRQEAIDRFNAPGAQQFCFLLSTRAGGLGIN 1134  
CHD5/680-1204 1204 GSSLVKSSGKMLMLLQKMLKKLRDEGHRVLI F SQMTKMLDLLEDFLIEHEGYKYERIDGGITGGLRQEAIDRFNAPGAQQFCFLLSTRAGGLGIN 1108  
CHD3/716-1240 1240 GGALLKSSGKMLMLLQKMLRKLKEGGHRLVIFSQMTKMLDLLEDFLIDYEGYKYERIDGGITGALRQEAIDRFNAPGAQQFCFLLSTRAGGLGIN 1144  
CHD1/460-980 1460 LQHLIRSSGKLLLDKLLILRLRERGNRVLI F SQMVRLDILAEYLKYRQFPFQRLDGSIKGELRQALDHFAEGSEDFCFLLSTRAGGLGIN 872  
CHD2/464-983 1464 LLSLLIRSSGKLLLDKLLTLRLRERGNRVLI F SQMVRLDILAEYLTKHYPFQRLDGSIKGEIRQALDHFNADGSEDFCFLLSTRAGGLGIN 875  
Chd1/358-880 1358 LRGLIMSSGKMLLDQLLTLRLKKDGHRVLI F SQMVRLDILAGDYLISKHINFORLDGTVPSAQRISIDHENS PDSNDFVLLSTRAGGLGIN 779  
Isw1/181-686 1686 --HLVYNAAKLQVLDKLLKLLKEGSRVLI F SQMSRLDILLEDYCYFRNVEYCRIDGSTAHEDRIQAIDDYNA PDSKKFVLLSTRAGGLGIN 586  
Snf2/742-1268 1268 --DIWRVAGKFLDLRLIPKLKATGHRVLI F FQMTQIMDILEDYIRYINIKYLRDGHGTSKDSERSELLRFNA PDSSEYLCFLLSTRAGGLGIN 1171  
CHD6/443-967 1443 LQAMQVAGKLLVLDKLLPKLKIAGGHKVLIFSQMVRLDILEDYLIQRRYTYERIDGRVVRGNLRQAAIDRFCKPDSDRFVLLSTRAGGLGIN 867  
CHD7/950-1475 1475 LQAMQVAGKLLVLDKLLPKLKIAGGHKVLIFSQMVRLDILEDYLIQRRYTYERIDGRVVRGNLRQAAIDRFCKPDSDRFVLLSTRAGGLGIN 1374  
CHD9/842-1367 1367 LQAMQVAGKLLVLDKLLPKMKAGGHKVLIFSQMVRLDILEDYLIQRRYTYERIDGRVVRGNLRQAAIDRFCKPDSDRFVLLSTRAGGLGIN 1266  
CHD8/793-1318 1318 LQAMVRSAGKLLVLDKLLPKLKAGGHKVLIFSQMVRLDILEDYLIQRRYTYERIDGRVVRGNLRQAAIDRFCKPDSDRFVLLSTRAGGLGIN 1217

Trp1148

'Arg fingers' IV

IVa

V

CHD4/706-1230 1230 LATADTVIIFDSDWNPNDIQAFSRAHRIGQNKVMYIRYFVTRASVEERIITQVAKKMMMLTHLVVRPGLG-----SKTGSMSKQEL 1215  
CHD5/680-1204 1204 LATADTVIIFDSDWNPNDIQAFSRAHRIGQNKVMYIRYFVTRASVEERIITQVAKKMMMLTHLVVRPGLG-----SKSGSMTKQEL 1189  
CHD3/716-1240 1240 LATADTVIIFDSDWNPNDIQAFSRAHRIGQNKVMYIRYFVTRASVEERIITQVAKKMMMLTHLVVRPGLG-----SKAGSMSKQEL 1225  
CHD1/460-980 1460 LASADTVIIFDSDWNPNDLQAQARAHRIGQKQVNIYRVLTKGVEEEDILERAKKMVLHDHLVIQRMDTGTGTVLHTGTSAPSSSTPFNKQEL 965  
CHD2/464-983 1464 LASADTVIIFDSDWNPNDLQAQARAHRIGQKQVNIYRVLTKGVEEEDILERAKKMVLHDHLVIQRMDTGTGTVLHTGTSAPSSSTPFNKQEL 968  
Chd1/358-880 1358 LMTADTVIIFDSDWNPNDLQAQARAHRIGQKQVNIYRVLTKGVEEEDILERAKKMVLHDHLVIQRMDTGTGTVLHTGTSAPSSSTPFNKQEL 968  
Isw1/181-686 1686 LTSADVVVLYDSDWNPQADLQAMDRAHRIGQKQVVKVRLVTDNSEEKILERATQKRLRDQLVIQNRSTSLKK-----KENKADSKDAL 671  
Snf2/742-1268 1268 LQTADTVIIFDSDWNPNDLQAQARAHRIGQKQVNIYRVLTKGVEEEDILERAKKMVLHDHLVIQNRSTSLKK-----NKSTSEEQAL 1253  
CHD6/443-967 1443 LTAADTCIIFDSDWNPNDLQAQARAHRIGQKQVVKVYRLITRNSYEREMFDKASLKLGLDKALQDIN-RKGGT-----NGVQQLSKMEV 952  
CHD7/950-1475 1475 LTAADTCIIFDSDWNPNDLQAQARAHRIGQKQVVKVYRLITRNSYEREMFDKASLKLGLDKALQDIN-RKGGT-----NGVQQLSKMEV 952  
CHD9/842-1367 1367 LTAADTCIIFDSDWNPNDLQAQARAHRIGQKQVVKVYRLITRNSYEREMFDKASLKLGLDKALQDIN-RKGGT-----NGVQQLSKMEV 952  
CHD8/793-1318 1318 LTAADTCIIFDSDWNPNDLQAQARAHRIGQKQVVKVYRLITRNSYEREMFDKASLKLGLDKALQDIN-RKGGT-----TGIIQQFSKKEL 1303

Va

VI

CHD4/706-1230 1230 DDILKFGTEELFKDE 1230  
CHD5/680-1204 1204 DDILKFGTEELFKDD 1204  
CHD3/716-1240 1240 DDILKFGTEELFKDE 1240  
CHD1/460-980 966 SAILKFGAEELFKEP 980  
CHD2/464-983 969 TAILKFGAEDLFKEL 983  
Chd1/358-880 866 SAILKFGAGNMFAT 980  
Isw1/181-686 672 LSMIQHGAADVFKSG 686  
Snf2/742-1268 1254 LRSLLDAEEERRKKR 1268  
CHD6/443-967 953 EDLLRKGAYGALMDE 967  
CHD7/950-1475 1461 EDLLRKGAYGALMDE 1475  
CHD9/842-1367 1353 EDLLRKGAYGALMEE 1367  
CHD8/793-1318 1304 EDLLRKGAYGALMEE 1318
