# Supplementary figures and images for: Nucleosome-CHD4 chromatin remodeler structure maps human disease mutations
Source: eLife journal article supplement (doi:10.7554/elife.56178), 2020-06-16

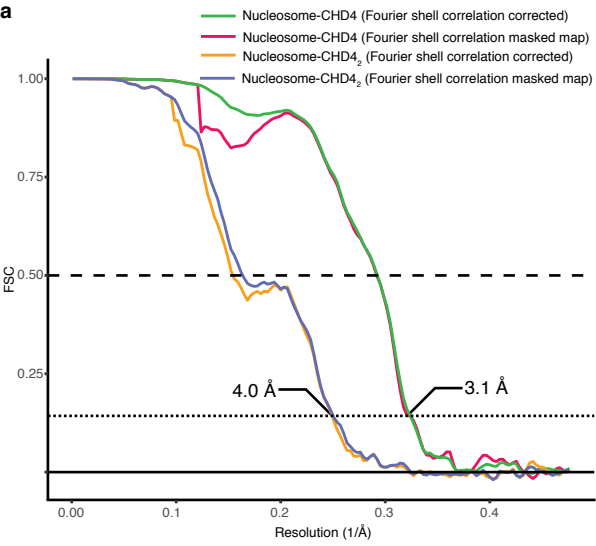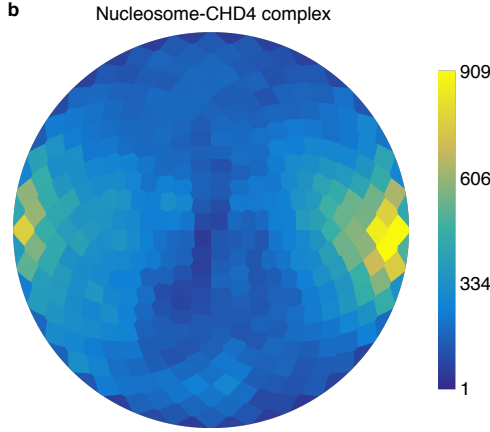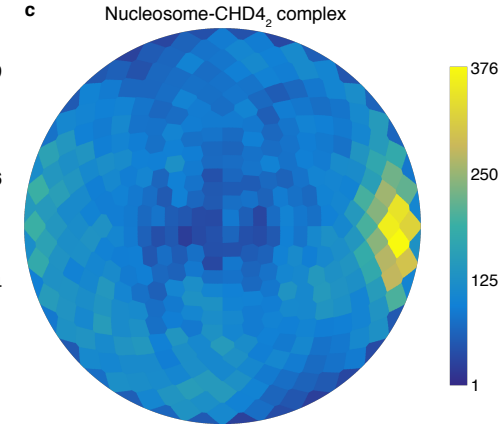

**d** Nucleosome-CHD4 complex

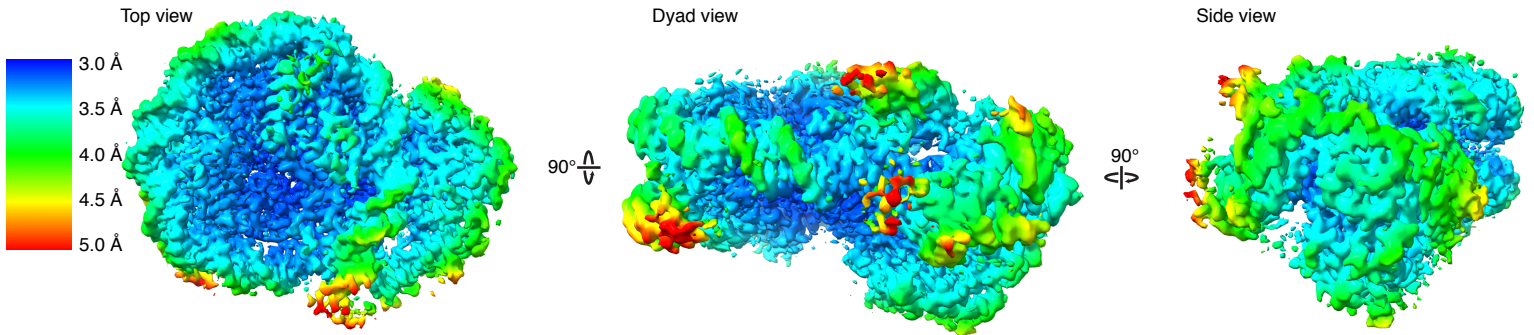

**e** Nucleosome-CHD4<sub>2</sub> complex

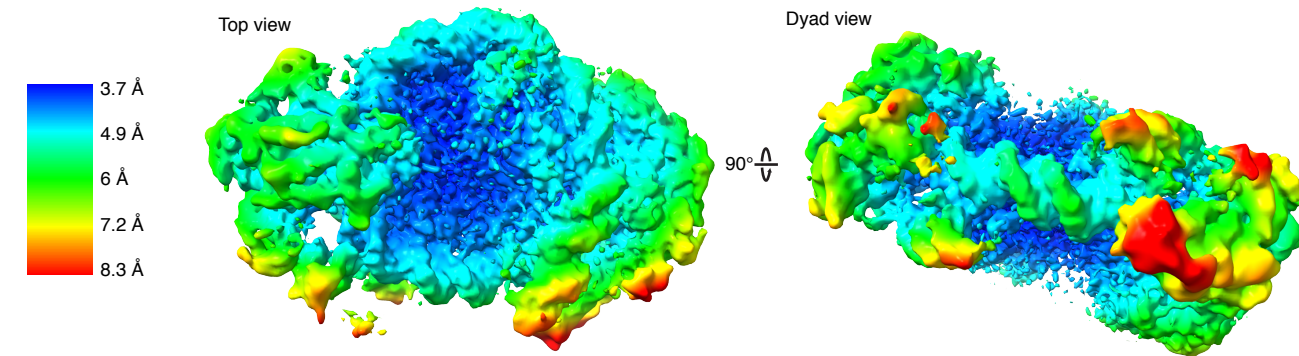

**f**

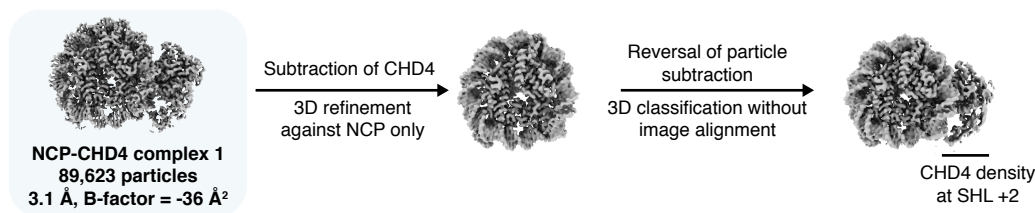

Supplement: supp [file elife-56178-supp-v1.zip]

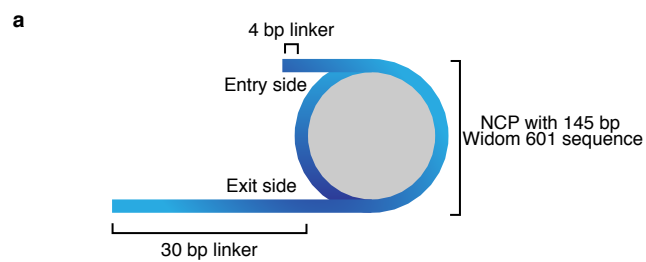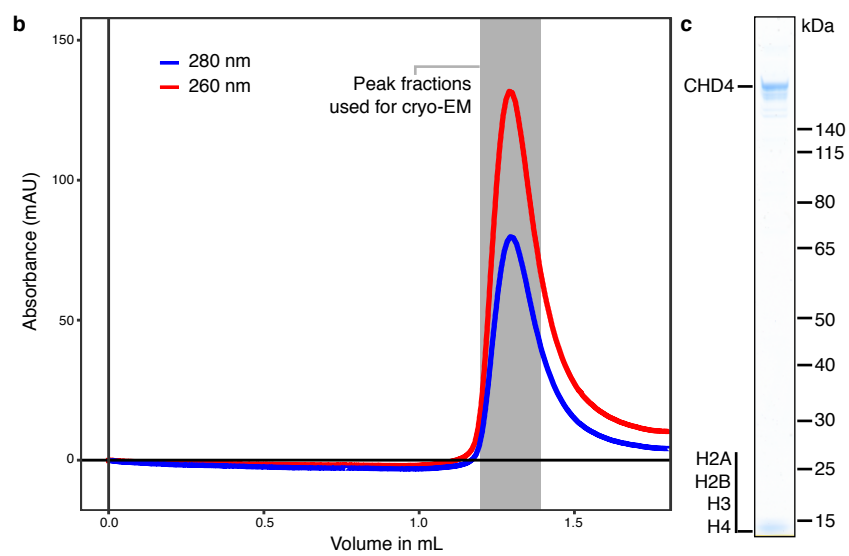

Supplement: supp [file elife-56178-supp-v1.zip]

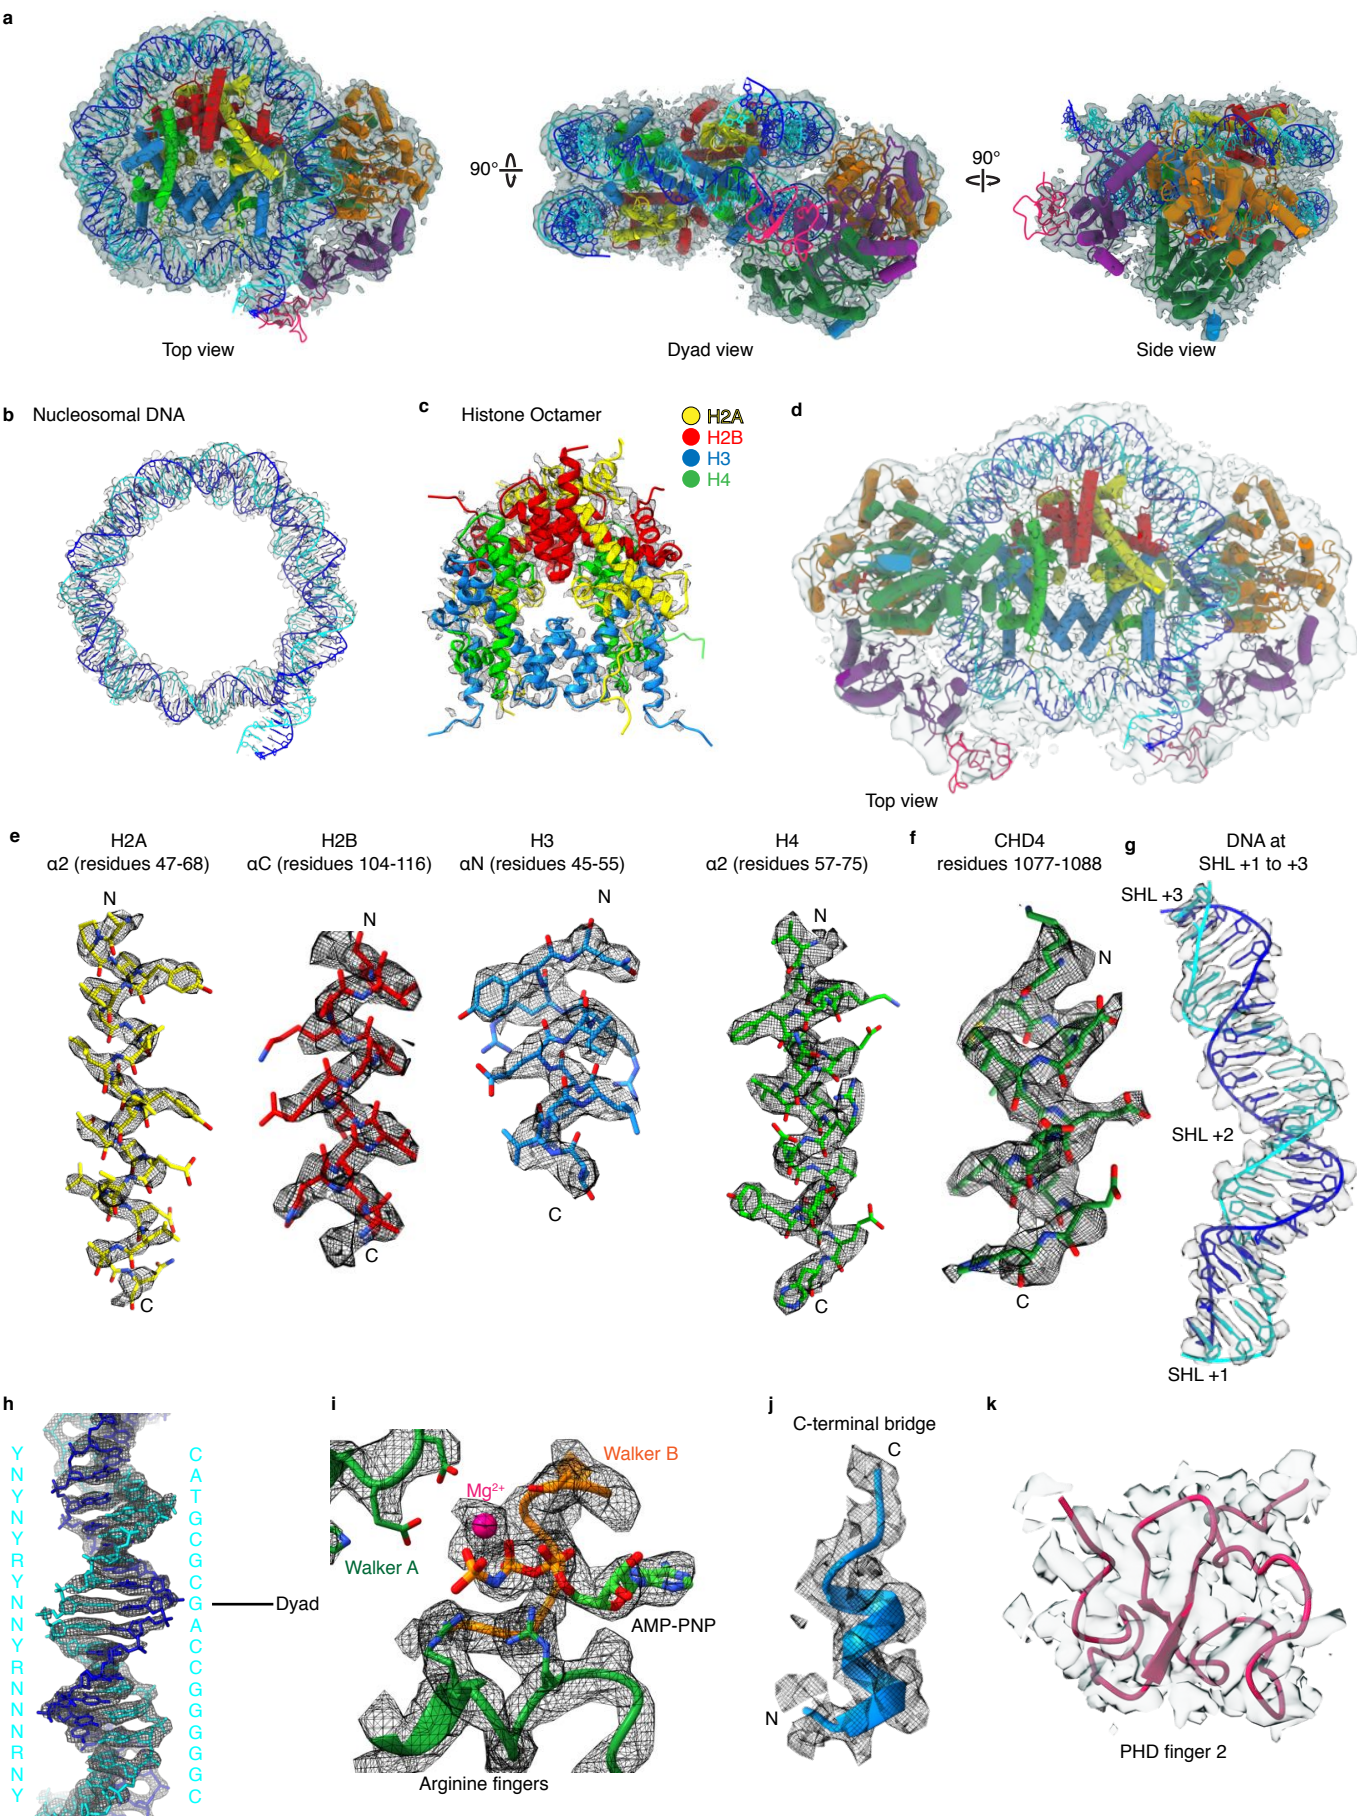

Supplement: supp [file elife-56178-supp-v1.zip]

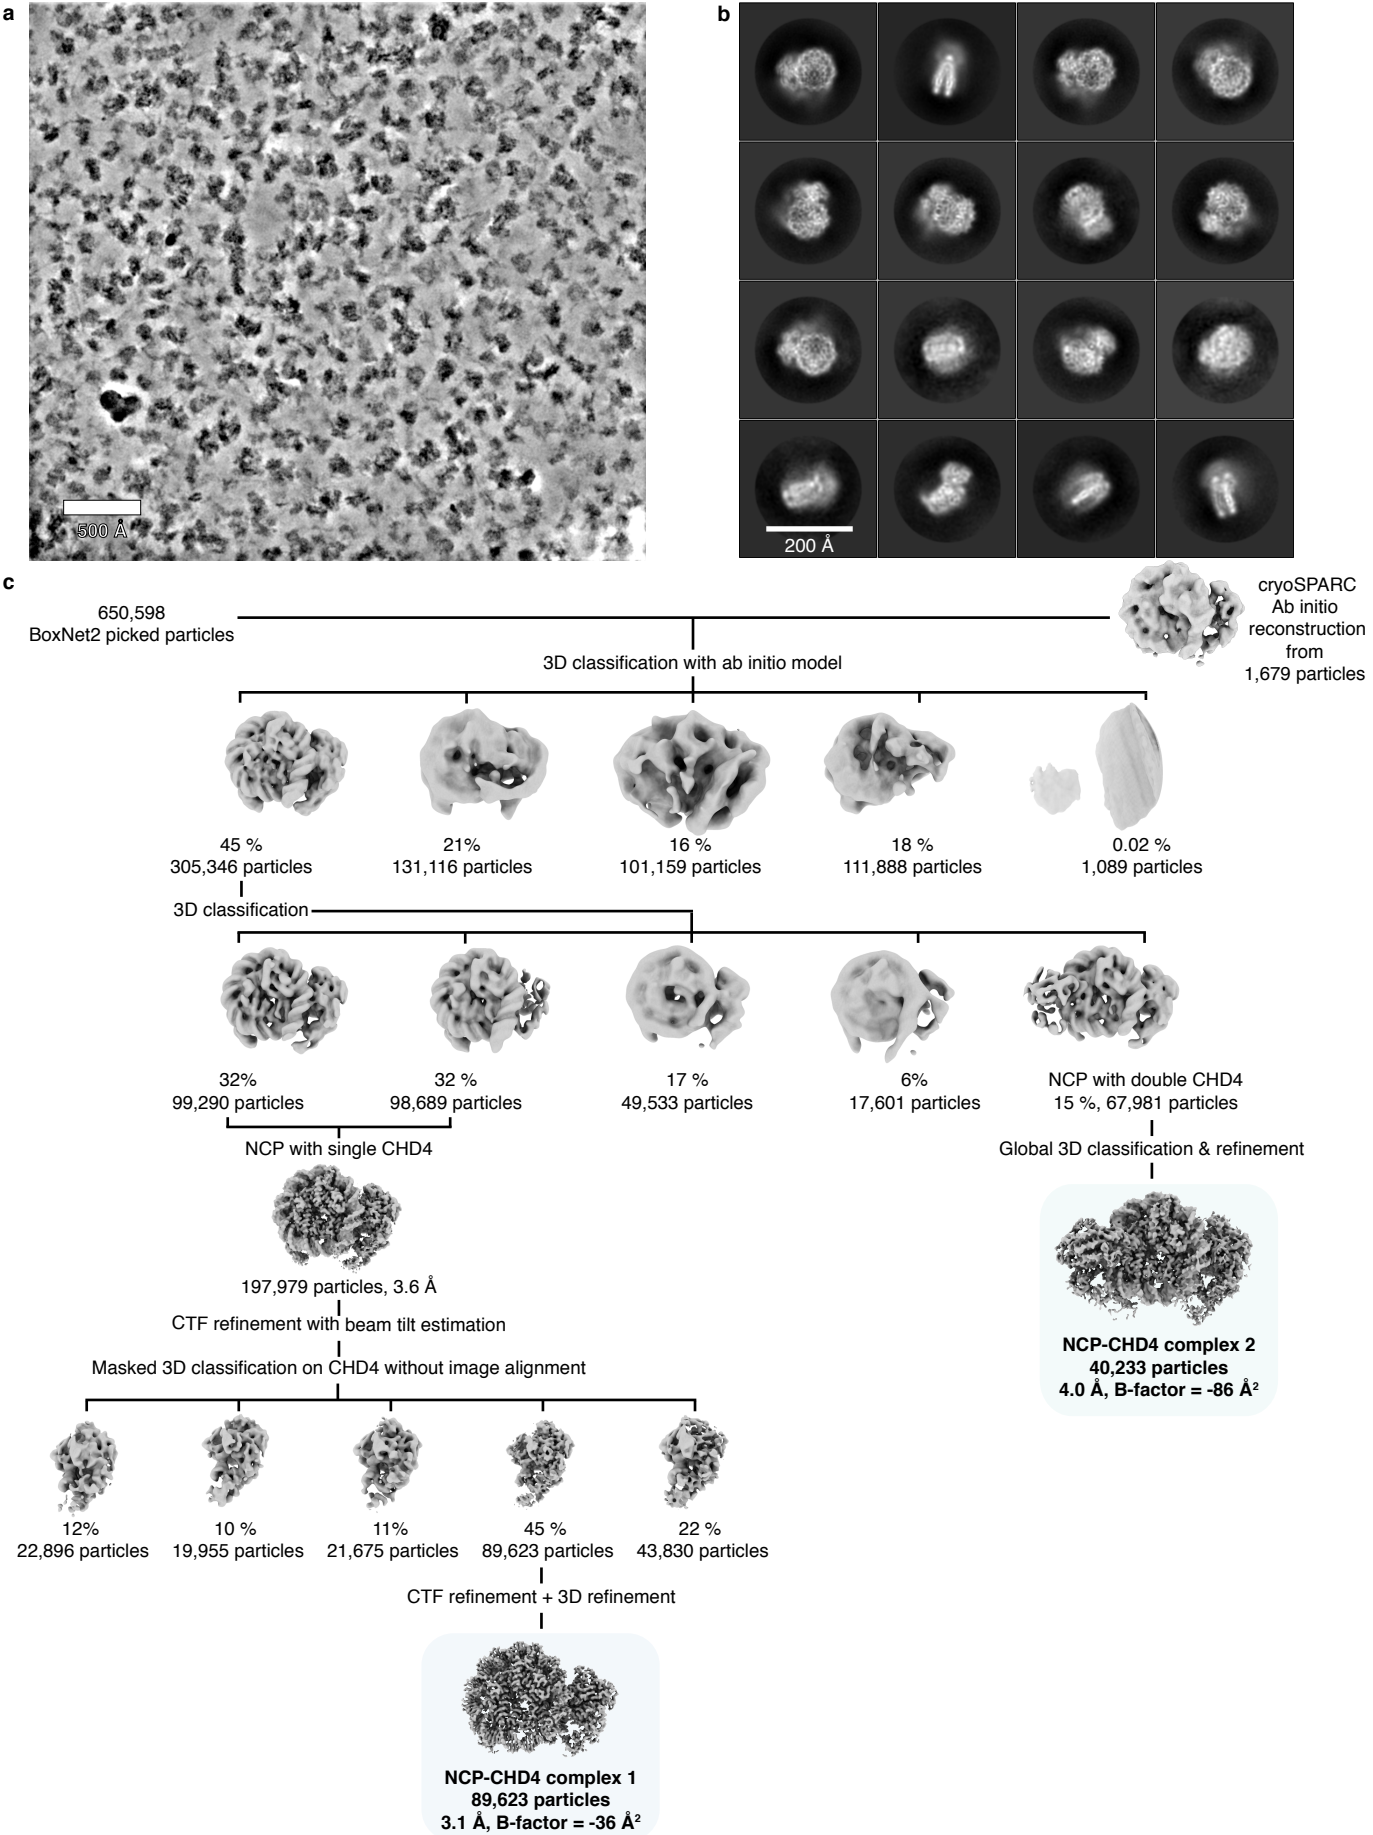

Supplement: supp [file elife-56178-supp-v1.zip]
